# Supplementary material for: Facile preparation of flexible binder-free graphene electrodes for high-performance supercapacitors
Source: Royal Society of Chemistry journal article supplement (doi:10.1039/d2ra01658c), 2022-01-01
Supplement: d2ra01658c1.pdf [file d2ra01658c1.pdf]

## Supplementary Information

### Facile Preparation of Flexible Binder-Free Graphene Electrodes for High-Performance Supercapacitors

Shiqi Lin<sup>a,b</sup>, Jie Tang<sup>a,b,\*</sup>, Wanli Zhang<sup>a,b</sup>, Kun Zhang<sup>a</sup>, Youhu Chen<sup>a</sup>, Runsheng Gao<sup>a</sup>,  
Hang Yin<sup>a,b</sup>, Xiaoliang Yu<sup>a</sup>, Lu-Chang Qin<sup>c</sup>

<sup>a</sup> *National Institute for Materials Science, 1-2-1 Sengen, Tsukuba, Ibaraki 305-0047,  
Japan*

<sup>b</sup> *University of Tsukuba, 1-1-1 Tennodai, Tsukuba, Ibaraki 305-0006, Japan*

<sup>c</sup> *Department of Physics and Astronomy, University of North Carolina at Chapel Hill,  
Chapel Hill, NC 27599-3255, USA*

Corresponding author: Jie Tang, [tang.jie@nims.go.jp](mailto:tang.jie@nims.go.jp)

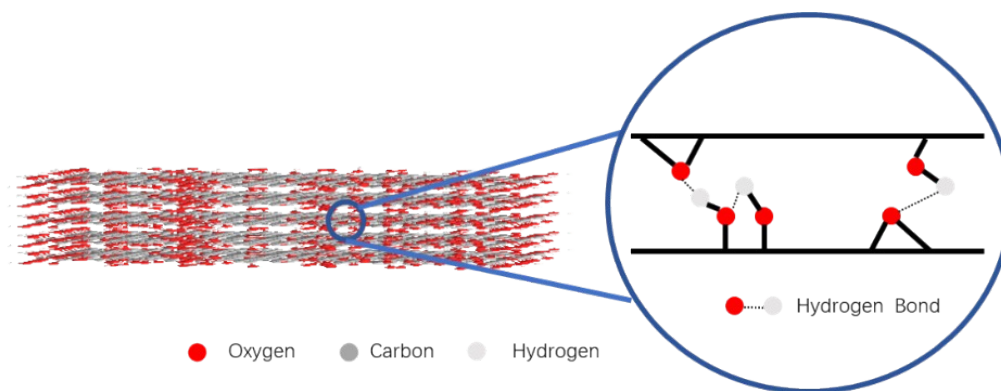

**Fig. S1.** Schematic illustration of hydrogen bonds in graphene oxide (GO).

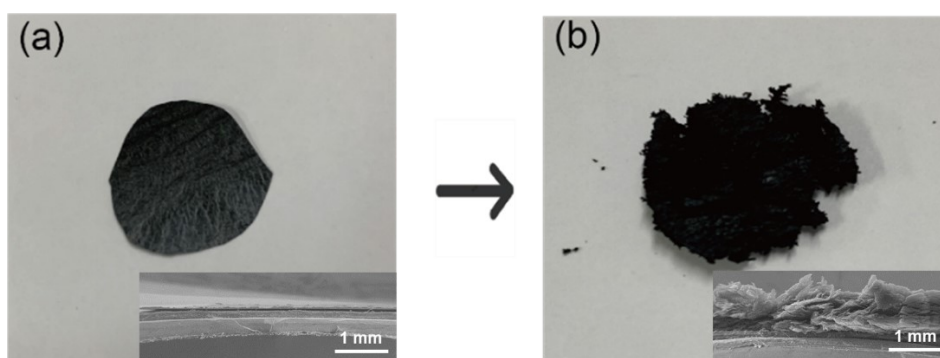

**Fig. S2.** Optical and SEM (inset) images of (a) GO film and (b) Reduced GO film prepared by thermal treatment at 500 °C.

**Table S1** Raman Peaks of GO film, GO/TRGO film and reduced-GO/TRGO film.

| Sample               | Peak Index | Raman Shift (cm <sup>-1</sup> ) | I <sub>D</sub> /I <sub>G</sub> Central Peak Ratio |
|----------------------|------------|---------------------------------|---------------------------------------------------|
| GO film              | D          | 1364.                           | 0.93                                              |
|                      | G          | 1584                            |                                                   |
| GO/TRGO film         | D          | 1370                            | 0.96                                              |
|                      | G          | 1588                            |                                                   |
| reduced-GO/TRGO film | D          | 1359                            | 0.98                                              |
|                      | G          | 1586                            |                                                   |

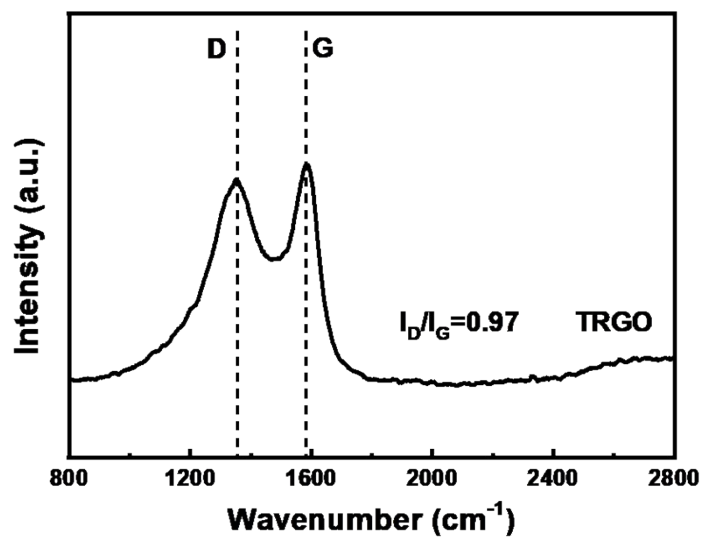

**Fig. S3.** Raman spectrum of TRGO.

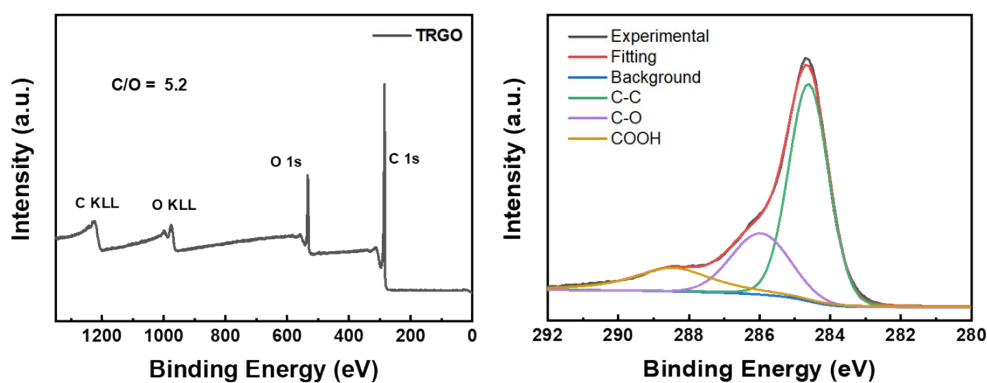

Fig. S4. (a) XPS survey spectra and (b) XPS high-resolution C 1s spectra of TRGO.

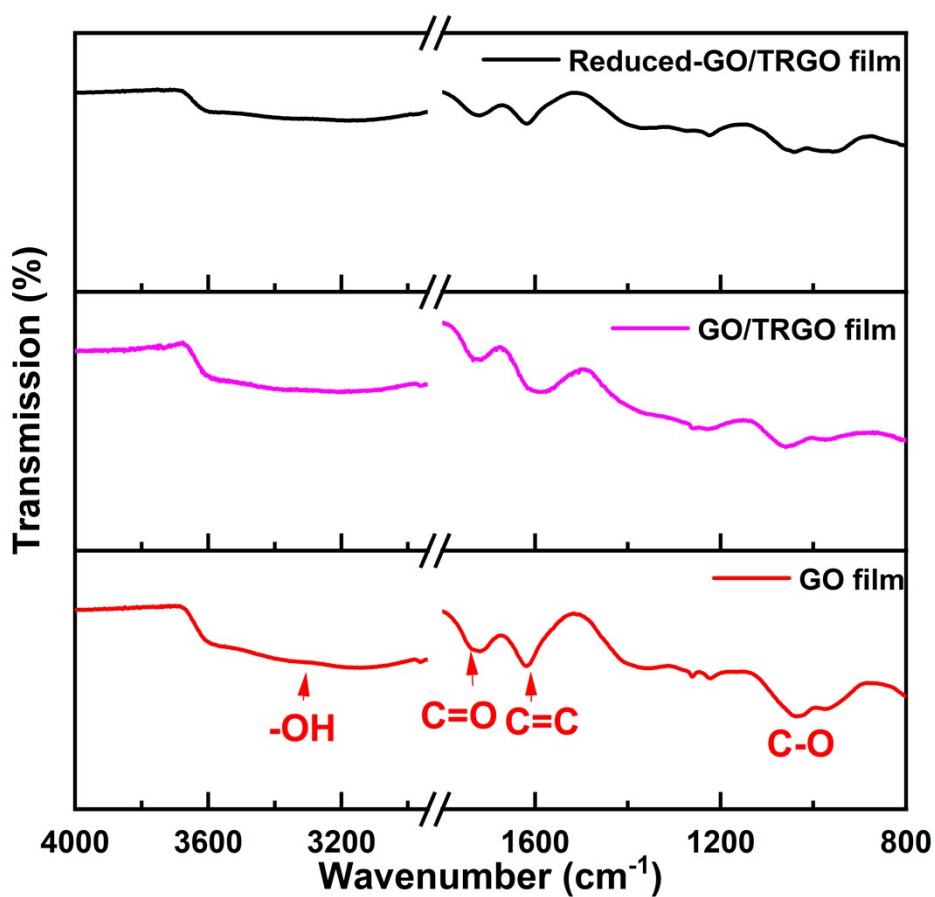

Fig. S5. FTIR spectra of GO, GO/TRGO, and reduced-GO/TRGO films.

Table S2 Specific surface area of GO/TRGO films before and after reduction.

| GO/TRGO Film         |                                           |
|----------------------|-------------------------------------------|
| GO/TRGO (Mass ratio) | Specific Surface Area (m <sup>2</sup> /g) |
| 1:0                  | 8.9                                       |
| 3:1                  | 97.5                                      |
| 1:1                  | 218.0                                     |
| 1:3                  | 253.1                                     |
| 0:1                  | 357                                       |

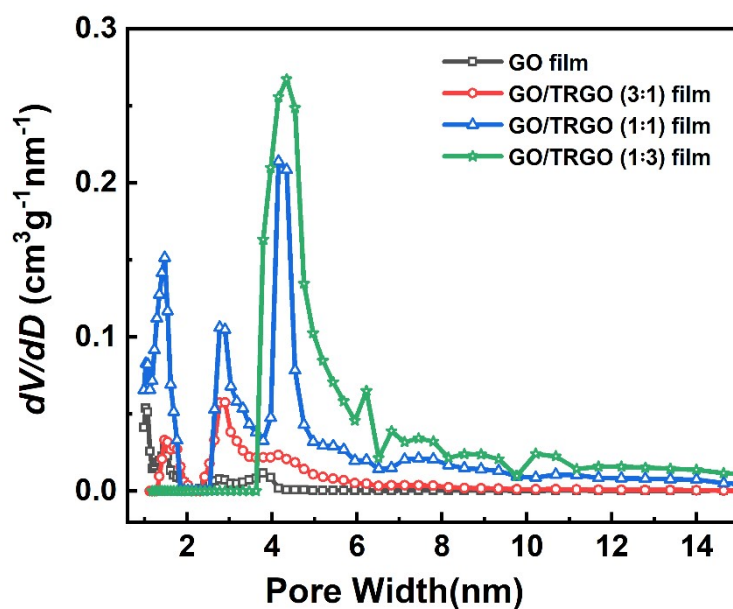

**Fig. S6.** Pore size distribution of GO film and GO/TRGO films with different composition (1:0, 3:1, 1:1, 1:3).

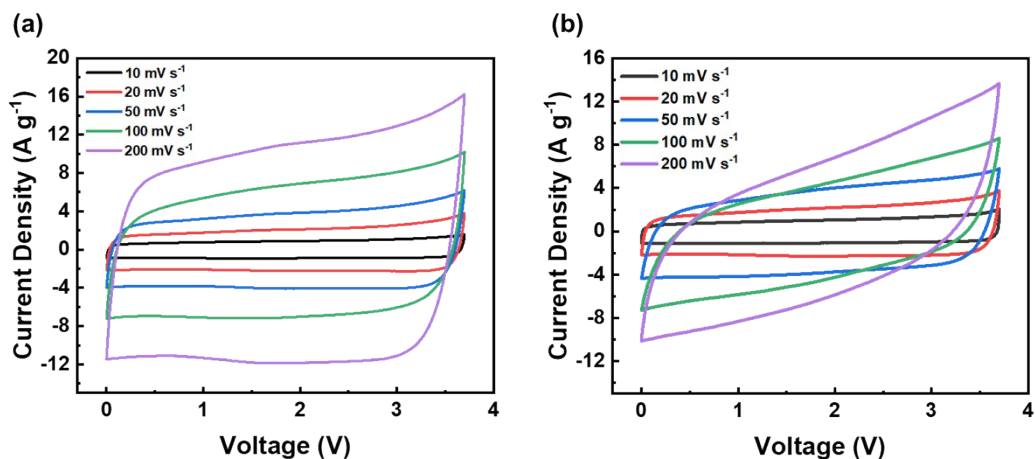

**Fig. S7.** CV curves of supercapacitors with (a) free-standing reduced-GO/TRGO (1:1) film and (b) filtered TRGO film electrodes at various scanning rate from 10 to 200  $mV s^{-1}$ .

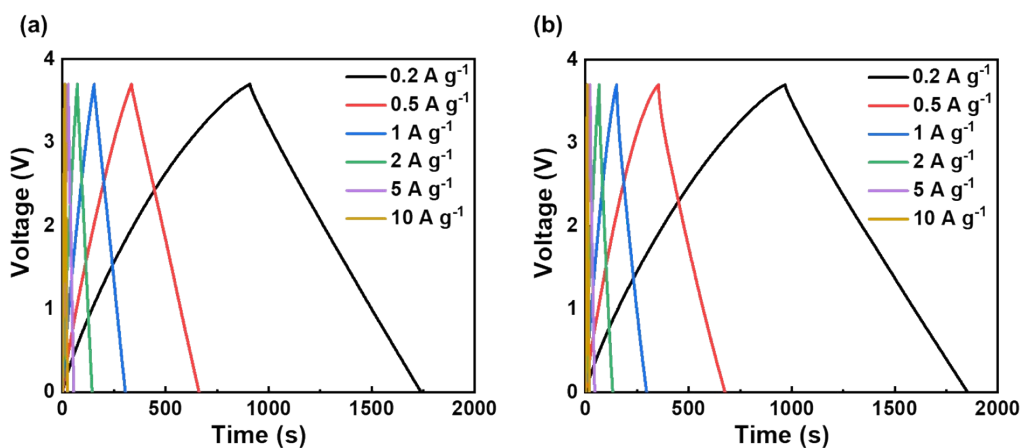

**Fig. S8.** Galvanostatic charge–discharge curves of supercapacitors with (a) free-standing reduced-GO/TRGO (1:1) film and (b) filtered TRGO film electrodes at different current densities from 0.2 to 10  $A g^{-1}$ .

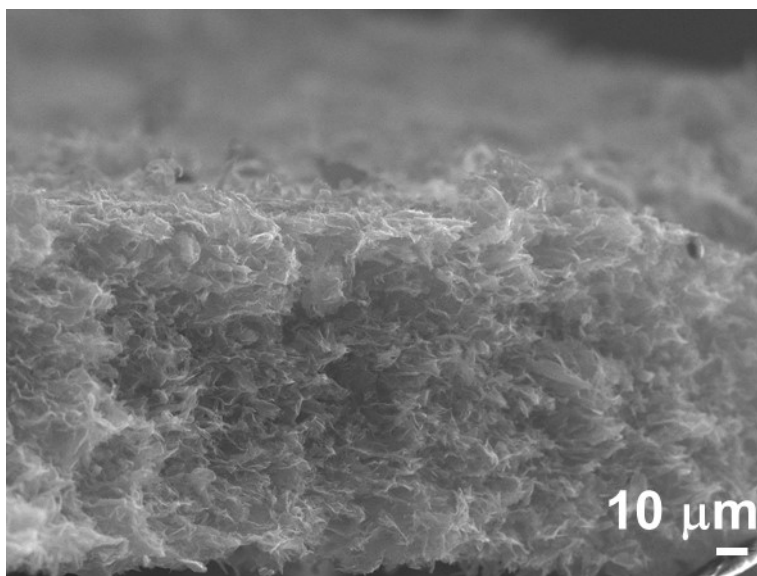

**Fig. S9.** Cross-sectional SEM image of filtered TRGO film.

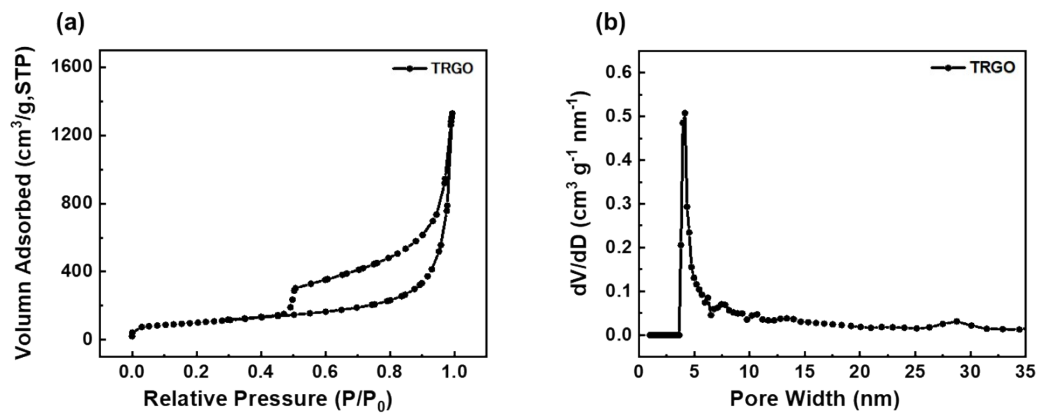

**Fig. S10.** (a) Nitrogen adsorption/desorption isotherms and (b) Pore size distribution of filtered TRGO film.

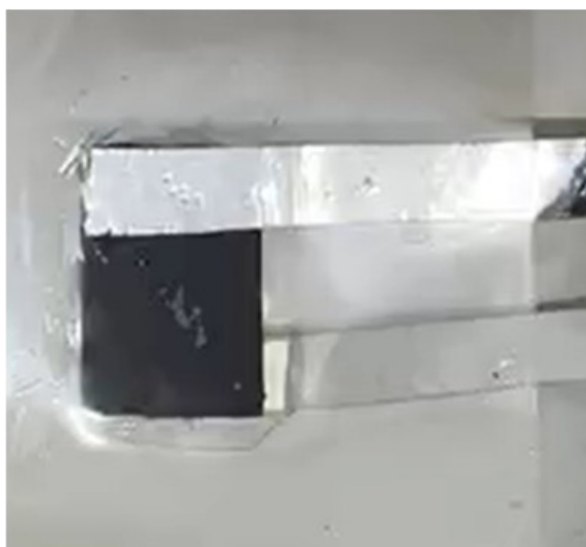

**Fig. S11.** Photograph of fabricated solid state supercapacitor.

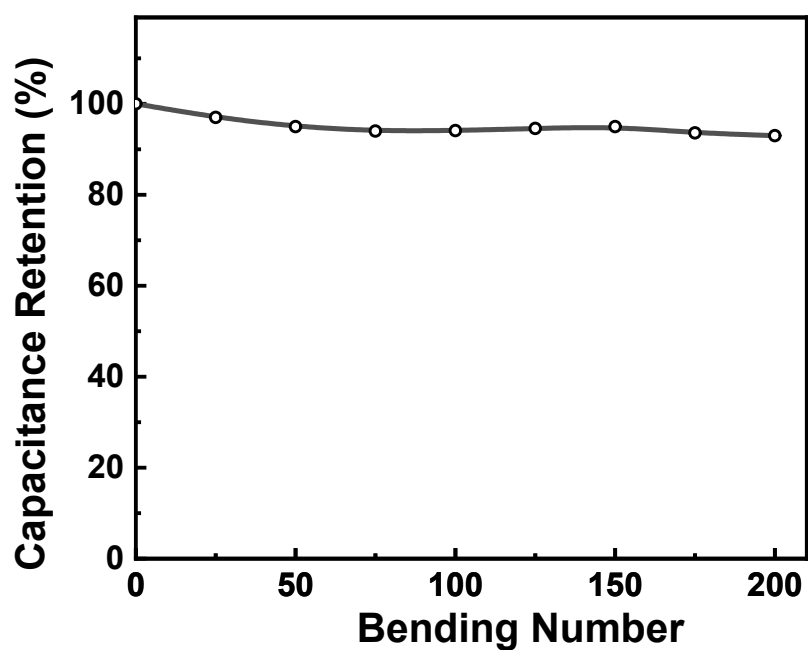

**Fig. S12.** Capacitance retention of solid state supercapacitor with free-standing reduced-GO/TRGO (1:1) film at bend angle of  $180^\circ$  under different bending cycle.



**Table S3** Comparison of electrochemical performance with relevant graphene-based materials reported in literature.

| Material                                | Electrolyte                            | Test Condition | Specific Capacitance (F g <sup>-1</sup> ) | Energy Density (Wh kg <sup>-1</sup> ) | Reference        |
|-----------------------------------------|----------------------------------------|----------------|-------------------------------------------|---------------------------------------|------------------|
| RGO/AC/CNT                              | Organic (1M LiClO <sub>4</sub> EC/DEC) | 0.2 A/g        | 101                                       | 30                                    | Ref. 2           |
| N-doped holey graphene aerogel          | EMIMTFSI                               | 1 A/g          | 142.3                                     | 60.5                                  | Ref. 3           |
| PCSG-60                                 | TEABF <sub>4</sub>                     | 1 A/g          | 221                                       | 38.2                                  | Ref. 4           |
| IL-induced RGO                          | BMIMPF <sub>6</sub>                    | 0.5 A/g        | 150                                       | 25.3                                  | Ref. 5           |
| EDA/RGO                                 | BMIMBF <sub>4</sub>                    | 2 mV/s         | 119                                       | 51                                    | Ref. 6           |
| N-doped graphene                        | BMIMBF <sub>4</sub>                    | 1 A/g          | 137                                       | 55                                    | Ref. 7           |
| N/O co-doped hierarchical porous carbon | EMIBF <sub>4</sub>                     | 1 A/g          | 51.9                                      | 22.1                                  | Ref. 8           |
| UHFG                                    | TEABF <sub>4</sub>                     | 1 A/g          | 182                                       | 46                                    | Ref. 9           |
| <b>Flexible graphene</b>                | <b>EMIBF<sub>4</sub></b>               | <b>0.2 A/g</b> | <b>180</b>                                | <b>85.6</b>                           | <b>This work</b> |

## References

- 1 V. Sedlakova, J. Sikula, J. Majzner, P. Sedlak, T. Kupařowitz, B. Buegler and P. Vasina, *J. Power Sources*, 2015, **286**, 58–65.
- 2 X. Li, Y. Tang, J. Song, W. Yang, M. Wang, C. Zhu, W. Zhao, J. Zheng and Y. Lin, *Carbon*, 2018, **129**, 236–244.
- 3 P. Xu, Q. Gao, L. Ma, Z. Li, H. Zhang, H. Xiao, X. Liang, T. Zhang, X. Tian and C. Liu, *Carbon*, 2019, **149**, 452–461.
- 4 D. Wang, S. Liu, L. Jiao and G. Fang, *Electrochim. Acta*, 2017, **252**, 109–118.
- 5 Y. Yan, N. Cui, F. Liu, X. F. Hao, Y.-H. Li, Y.-B. Zhang, Z.-Z. Pan, N. Wu and C. Hao, *J. Alloys Compd.*, 2019, **776**, 22–30.
- 6 B. Song, J. Zhao, M. Wang, J. Mullavey, Y. Zhu, Z. Geng, D. Chen, Y. Ding, K. Moon, M. Liu and C.-P. Wong, *Nano Energy*, 2017, **31**, 183–193.
- 7 S. Dai, Z. Liu, B. Zhao, J. Zeng, H. Hu, Q. Zhang, D. Chen, C. Qu, D. Dang and M. Liu, *J. Power Sources*, 2018, **387**, 43–48.
- 8 Y. Zhou, J. Ren, L. Xia, Q. Zheng, J. Liao, E. Long, F. Xie, C. Xu and D. Lin, *Electrochim. Acta*, 2018, **284**, 336–345.
- 9 Z. Li, S. Gadipelli, Y. Yang, G. He, J. Guo, J. Li, Y. Lu, C. A. Howard, D. J. L. Brett, I. P. Parkin, F. Li and Z. Guo, *Energy Storage Mater.*, 2019, **17**, 12–21.
